# Supplementary material for: Emergence and Spread of Extended Spectrum β-Lactamase Producing Enterobacteriaceae (ESBL-PE) in Pigs and Exposed Workers: A Multicentre Comparative Study between Cameroon and South Africa
Source: PubMed Central journal article supplement (PMC6470761; doi:10.3390/pathogens8010010), 2019-01-16
Supplement: pathogens-08-00010-s001.pdf [file pathogens-08-00010-s001.pdf]

**Table S1. Overall prevalence of extended spectrum  $\beta$ -lactamase (ESBL) producing bacteria isolated from humans per country and specimen type**

| Bacteria               | Cameroon        |                 | South Africa    |                 |
|------------------------|-----------------|-----------------|-----------------|-----------------|
|                        | Hand (%)        | Nasal (%)       | Hand (%)        | Nasal (%)       |
| <i>E. coli</i>         | 16 (41)         | 15 (47)         | 0               | 0               |
| <i>E. dissolvens</i>   | 2 (5)           | 1 (3)           | 0               | 0               |
| <i>K. pneumoniae</i>   | 2 (5)           | 6 (19)          | 0               | 0               |
| <i>Shigella sonnei</i> | 1 (3)           | 1 (3)           | 0               | 0               |
| Others                 | 18 (46)         | 9 (28)          | 10 (50)         | 10 (50)         |
| <b>Total</b>           | <b>39 (100)</b> | <b>32 (100)</b> | <b>10 (100)</b> | <b>10 (100)</b> |

**Table S2. Overall prevalence of extended spectrum  $\beta$ -lactamase (ESBL) producing bacteria isolated from animals per country and specimen type**

| Bacteria                               | Cameroon        |                 | South Africa    |                 |
|----------------------------------------|-----------------|-----------------|-----------------|-----------------|
|                                        | Nasal (%)       | Rectal (%)      | Nasal (%)       | Rectal (%)      |
| <i>Bordetella bronchoseptica</i>       | 0               | 0               | 33 (60)         | 2 (5)           |
| <i>C. freundii</i>                     | 3 (3)           | 0               | 0               | 0               |
| <i>E. coli</i>                         | 29 (32)         | 42 (63)         | 10 (18)         | 17 (42.5)       |
| <i>Enterobacter cloacae dissolvens</i> | 8 (9)           | 0               | 0               | 0               |
| <i>K. ozaenae</i>                      | 1 (1)           | 0               | 0               | 0               |
| <i>K. pneumoniae</i>                   | 19 (21)         | 15 (22)         | 0               | 0               |
| <i>S. sonnei</i>                       | 1 (1)           | 4 (6)           | 0               | 0               |
| Others                                 | 29 (32)         | 6 (9)           | 12 (22)         | 21 (52.5)       |
| <b>Total</b>                           | <b>91 (100)</b> | <b>67 (100)</b> | <b>55 (100)</b> | <b>40 (100)</b> |

**Table S3. Prevalence and distribution of extended-spectrum  $\beta$ -lactamase producing-*E. coli* clusters per abattoir.**

| Cluster                      | Resistance profiles                           | No. isolates | No. isolates (%) | Abattoir |       |       |       |       |
|------------------------------|-----------------------------------------------|--------------|------------------|----------|-------|-------|-------|-------|
|                              |                                               |              |                  | SH001    | SH002 | SH003 | SH004 | SH005 |
| A                            | AMP.TMP/SXT.CXM.CXM-A.CTX                     | 5            | 5 (5)            | 0        | 0     | 0     | 0     | 5     |
| B                            | AMP.TMP/SXT.CXM.CXM-A.CTX                     | 1            | 3 (3)            | 2        | 0     | 0     | 0     | 1     |
|                              | AMP.TMP/SXT.CXM.CXM-A.CTX.CAZ                 | 1            |                  |          |       |       |       |       |
| C                            | AMP.TMP/SXT.CXM.CXM-A.CTX.CAZ.AMC.GEN.CIP     | 1            | 3 (3)            | 0        | 1     | 0     | 0     | 2     |
|                              | AMP.CXM.CXM-A.CTX.TMP/SXT.GEN.AMC             | 2            |                  |          |       |       |       |       |
| D                            | AMP.CXM.CXM-A.CTX.CIP.TMP/SXT                 | 1            | 12 (13)          | 0        | 0     | 3     | 0     | 7     |
|                              | AMP.TMP/SXT.CXM.CXM-A.CTX                     | 10           |                  |          |       |       |       |       |
| E                            | AMP.TMP/SXT.CXM.CXM-A.CTX.CAZ                 | 1            | 4 (4)            | 1        | 1     | 0     | 0     | 2     |
|                              | AMP.TMP/SXT.CXM.CXM-A.CTX.CAZ.FEP             | 1            |                  |          |       |       |       |       |
| F                            | AMP.TMP/SXT.CXM.CXM-A.CTX                     | 4            | 4 (4)            | 0        | 0     | 0     | 0     | 4     |
| G                            | AMP.TMP/SXT.CXM.CXM-A.CTX.CAZ                 | 2            | 3 (3)            | 3        | 0     | 0     | 0     | 0     |
|                              | AMP.CXM.CXM-A.CTX.CAZ.CIP.TMP/SXT.AMC.TZP     | 1            |                  |          |       |       |       |       |
| H                            | AMP.CXM.CXM-A.CTX.TMP/SXT.CAZ.FEP.AN.GEN.CS   | 1            | 4 (4)            | 2        | 1     | 0     | 0     | 1     |
|                              | AMP.TMP/SXT.CXM.CXM-A.CTX.AMC.TZP.CAZ         | 1            |                  |          |       |       |       |       |
| I                            | AMP.TMP/SXT.CXM.CXM-A.CTX.CAZ.AMC.FEP.GEN.CIP | 1            | 18 (19)          | 13       | 2     | 2     | 1     | 0     |
|                              | AMP.AMC.CXM.CXM-A.CTX.CIP                     | 1            |                  |          |       |       |       |       |
|                              | AMP.TMP/SXT.CXM.CXM-A.CTX                     | 2            |                  |          |       |       |       |       |
|                              | AMP.TMP/SXT.CXM.CXM-A.CTX.CAZ                 | 2            |                  |          |       |       |       |       |
|                              | AMP.TMP/SXT.CXM.CXM-A.CTX.CAZ.FEP             | 1            |                  |          |       |       |       |       |
|                              | AMP.TMP/SXT.CXM.CXM-A.CTX.CAZ.GEN.CIP         | 1            |                  |          |       |       |       |       |
|                              | AMP.TMP/SXT.CXM.CXM-A.CTX.CAZ.AMC.GEN.CIP     | 1            |                  |          |       |       |       |       |
|                              | AMP.TMP/SXT.CXM.CXM-A.CTX.AMC.TZP.CAZ         | 5            |                  |          |       |       |       |       |
| AM.CXM.CXM-A.CTX.FEP.TMP/SXT | 1                                             |              |                  |          |       |       |       |       |
|                              | AMP.CXM.CXM-A.CTX.CAZ                         | 2            |                  |          |       |       |       |       |

|                    |                                                       |           |                 |           |          |          |          |           |           |
|--------------------|-------------------------------------------------------|-----------|-----------------|-----------|----------|----------|----------|-----------|-----------|
|                    | AMP.CXM.CXM-A.CTX.CIP.TMP/SXT.AMC                     | 2         |                 |           |          |          |          |           |           |
|                    | AMP.CXM.CXM-A.CTX.GEN.TMP/SXT                         | 1         |                 |           |          |          |          |           |           |
| J                  | AMP.TMP/SXT.CXM.CXM-A.CTX                             | 1         | 8 (9)           | 7         | 0        | 1        | 0        | 0         | 0         |
|                    | AMP.TMP/SXT.CXM.CXM-A.CTX.CAZ                         | 3         |                 |           |          |          |          |           |           |
|                    | AMP.TMP/SXT.CXM.CXM-A.CTX.CAZ.FEP                     | 1         |                 |           |          |          |          |           |           |
|                    | AMP.TMP/SXT.CXM.CXM-A.CTX.CAZ.GEN.CIP                 | 1         |                 |           |          |          |          |           |           |
|                    | AMP.TMP/SXT.CXM.CXM-A.CTX.AMC.TZP.CAZ                 | 1         |                 |           |          |          |          |           |           |
|                    | AMP.CXM.CXM-A.CTX.CIP.TMP/SXT.AMC                     | 1         |                 |           |          |          |          |           |           |
|                    | AMP.TMP/SXT.CXM.CXM-A.CTX                             | 1         |                 |           |          |          |          |           |           |
| K                  | AMP.TMP/SXT.CXM.CXM-A.CTX.CAZ                         | 1         | 12 (13)         | 9         | 3        | 0        | 0        | 0         | 0         |
|                    | AMP.TMP/SXT.CXM.CXM-A.CTX.CAZ.AMC                     | 2         |                 |           |          |          |          |           |           |
|                    | AMP.TMP/SXT.CXM.CXM-A.CTX.CAZ.AMC.GEN.CIP             | 1         |                 |           |          |          |          |           |           |
|                    | AMP.TMP/SXT.CXM.CXM-A.CTX.AMC.TZP.CAZ                 | 3         |                 |           |          |          |          |           |           |
|                    | AMP.CXM.CXM-A.CAZ.CS                                  | 1         |                 |           |          |          |          |           |           |
|                    | AMP.TMP/SXT.CXM.CXM-A.CTX.CAZ.AMC.TZP.FOX.FEP.GEN.CIP | 1         |                 |           |          |          |          |           |           |
|                    | AMP.CXM.CXM-A.CTX.CAZ.CIP.GEN.TMP/SXT.TZP.FEP         | 1         |                 |           |          |          |          |           |           |
|                    | AMP.CXM.CXM-A.CTX.CAZ.CIP.GEN.TMP/SXT.TZP             | 1         |                 |           |          |          |          |           |           |
| L                  | AMP.TMP/SXT.CXM.CXM-A.CTX                             | 4         | 8 (9)           | 8         | 0        | 0        | 0        | 0         | 0         |
|                    | AMP.TMP/SXT.CXM.CXM-A.CTX.CAZ                         | 2         |                 |           |          |          |          |           |           |
|                    | AMP.CXM.CXM-A.CTX.CIP.TMP/SXT                         | 1         |                 |           |          |          |          |           |           |
|                    | AMP.CXM.CXM-A.CTX.GEN.TMP/SXT                         | 1         |                 |           |          |          |          |           |           |
| M                  | AMP.TMP/SXT.CXM.CXM-A.CTX                             | 4         | 7 (9)           | 0         | 0        | 0        | 4        | 4         | 4         |
|                    | AMP.CXM.CXM-A.CTX                                     | 1         |                 |           |          |          |          |           |           |
|                    | AMP.CXM.CXM-A.CTX.TMP/SXT.GEN                         | 1         |                 |           |          |          |          |           |           |
|                    | AMP.CXM.CXM-A.CTX.TMP/SXT.GEN.AMC                     | 1         |                 |           |          |          |          |           |           |
| N                  | AMP.TMP/SXT.CXM.CXM-A.CTX.CAZ                         | 1         | 3 (3)           | 3         | 0        | 0        | 0        | 0         | 0         |
|                    | AMP.TMP/SXT.CXM.CXM-A.CTX.CAZ.AMC                     | 1         |                 |           |          |          |          |           |           |
|                    | AMP.CXM.CXM-A.CTX.CAZ.FEP.GEN.TMP/SXT                 | 1         |                 |           |          |          |          |           |           |
| <b>Grand Total</b> |                                                       | <b>93</b> | <b>93 (100)</b> | <b>48</b> | <b>8</b> | <b>6</b> | <b>5</b> | <b>26</b> | <b>26</b> |

AMP: Ampicillin; AMC: Amoxicillin-clavulanate; AK: Amikacin; CXM: Cefuroxime; CXM-A: Cefuroxime-axetyl; CTX: Cefotaxime; CAZ: Ceftazidime; CS: Colistin; CIP: Ciprofloxacin; FEP: Cefepime; FOX: Cefoxitin; GM: Gentamicin; TMP/SXT: Trimethoprim-sulfamethoxazole; TZP: Piperacillin-tazobactam
